# Supplementary material
Source: PubMed Central journal article supplement (PMC8349109)
Supplement: tjaa293_suppl_supplementary-figure-1.pdf [file tjaa293_suppl_supplementary-figure-1.pdf]

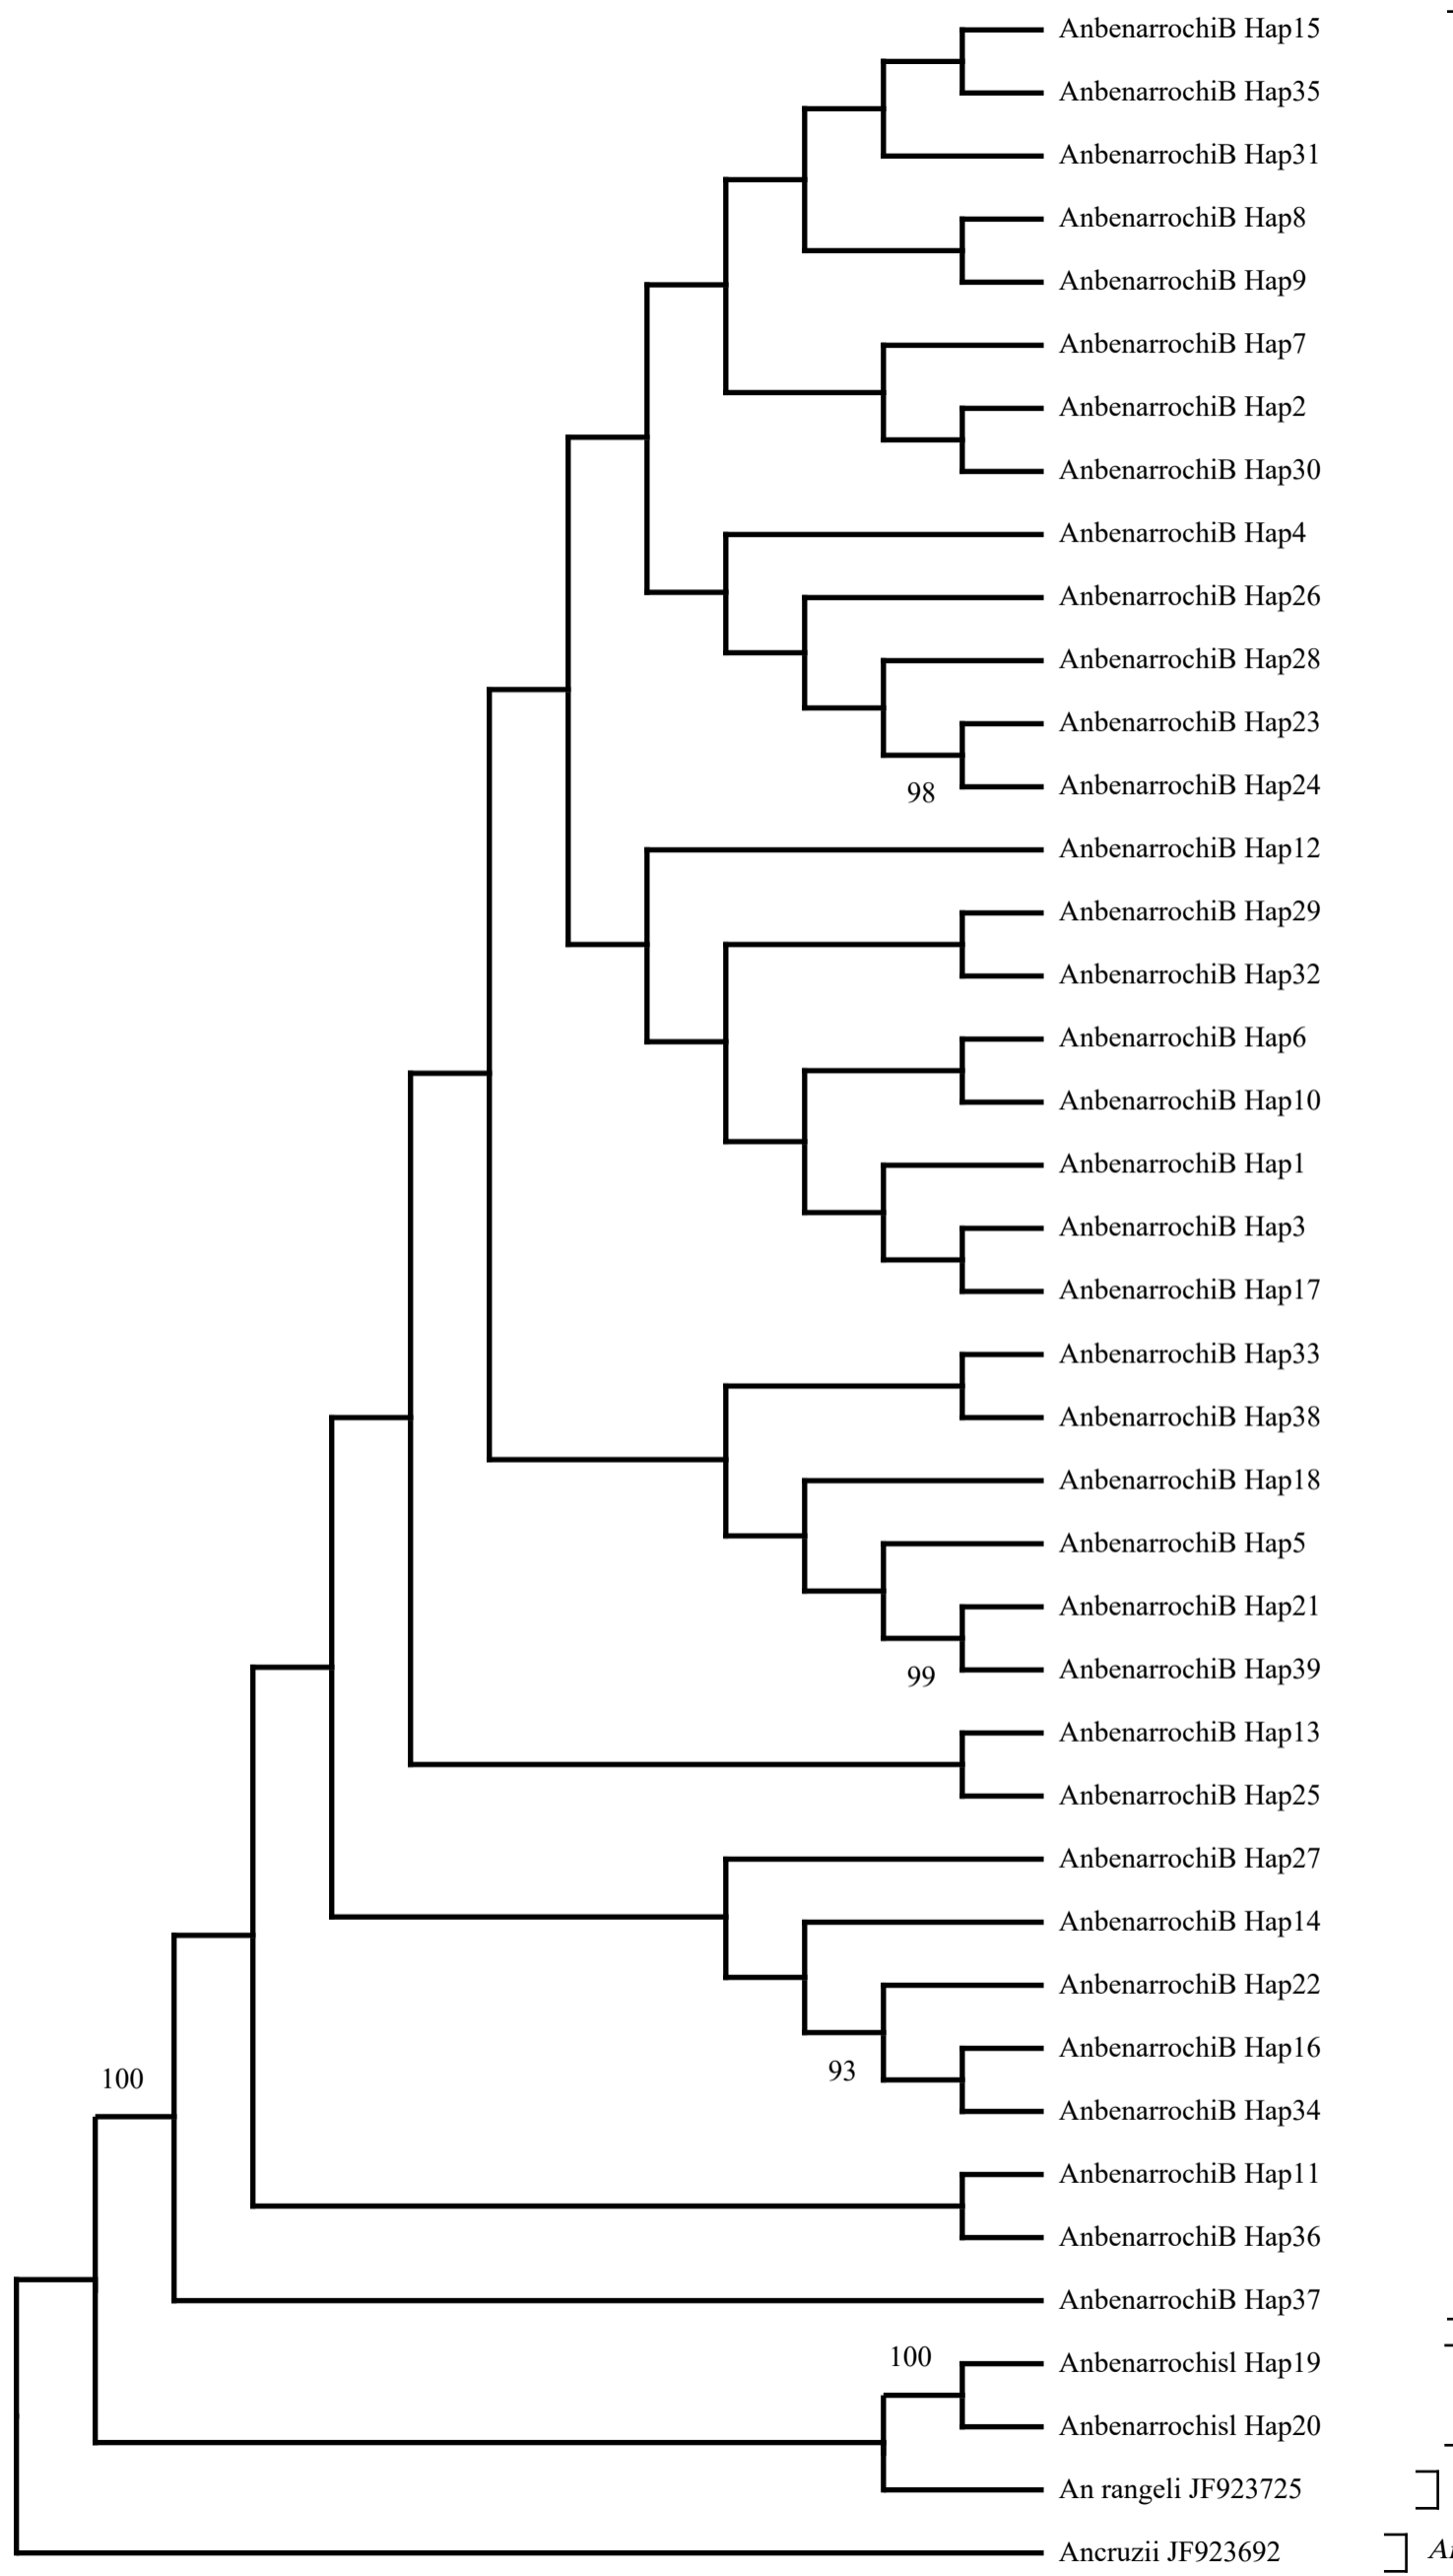

AnbenarrochiB Hap15  
 AnbenarrochiB Hap35  
 AnbenarrochiB Hap31  
 AnbenarrochiB Hap8  
 AnbenarrochiB Hap9  
 AnbenarrochiB Hap7  
 AnbenarrochiB Hap2  
 AnbenarrochiB Hap30  
 AnbenarrochiB Hap4  
 AnbenarrochiB Hap26  
 AnbenarrochiB Hap28  
 AnbenarrochiB Hap23  
 AnbenarrochiB Hap24  
 AnbenarrochiB Hap12  
 AnbenarrochiB Hap29  
 AnbenarrochiB Hap32  
 AnbenarrochiB Hap6  
 AnbenarrochiB Hap10  
 AnbenarrochiB Hap1  
 AnbenarrochiB Hap3  
 AnbenarrochiB Hap17  
 AnbenarrochiB Hap33  
 AnbenarrochiB Hap38  
 AnbenarrochiB Hap18  
 AnbenarrochiB Hap5  
 AnbenarrochiB Hap21  
 AnbenarrochiB Hap39  
 AnbenarrochiB Hap13  
 AnbenarrochiB Hap25  
 AnbenarrochiB Hap27  
 AnbenarrochiB Hap14  
 AnbenarrochiB Hap22  
 AnbenarrochiB Hap16  
 AnbenarrochiB Hap34  
 AnbenarrochiB Hap11  
 AnbenarrochiB Hap36  
 AnbenarrochiB Hap37  
 Anbenarrochisl Hap19  
 Anbenarrochisl Hap20  
 An rangeli JF923725  
 Ancruzii JF923692

*Anopheles benarrochi* B

*Anopheles benarrochi* s.l.

*Anopheles rangeli*

*Anopheles cruzii*
